# Supplementary material
Source: PubMed Central journal article supplement (PMC9387749)
Supplement: NIHMS1804696-supplement-1.pdf [file NIHMS1804696-supplement-1.pdf]

**Supplementary Figure 1.**

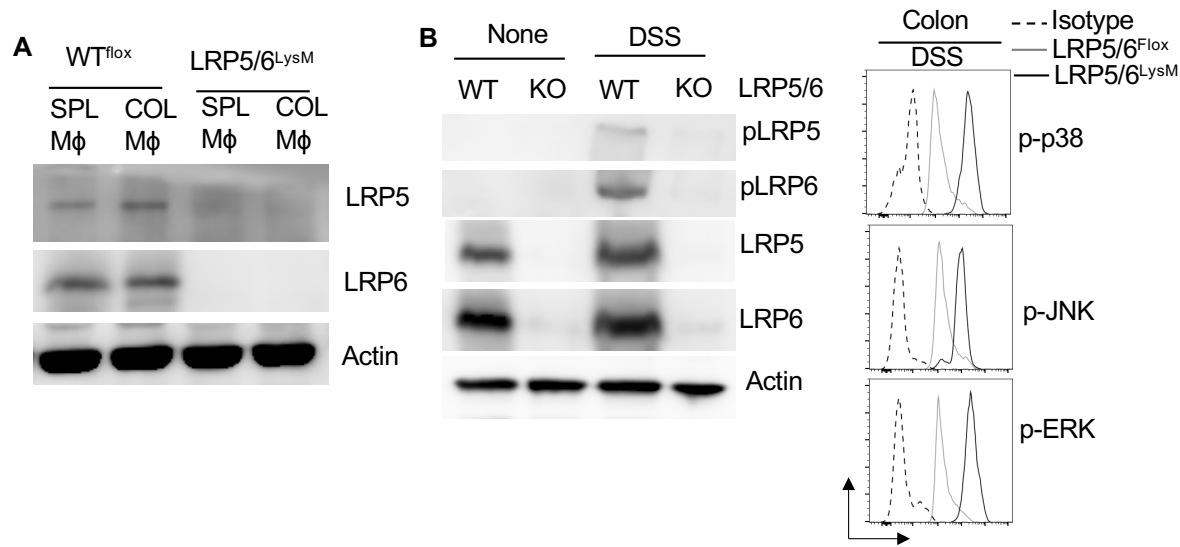

**Supplementary Figure 1. (A)** Immunoblot analysis of expression of LRP5 and LRP6 in colonic (COL) and splenic (SPL) macrophages isolated from LRP5/6<sup>Flox</sup> and LRP5/6<sup>LysM</sup> mice. **(B)** Immunoblot analysis of expression of the native and phosphorylated form of LRP5 and LRP6 in splenic macrophages isolated from DSS-treated LRP5/6<sup>Flox</sup> and LRP5/6<sup>LysM</sup> mice (day 8). **(C)** Representative histogram of phosphorylated p38, JNK, and ERK MAPKs in colonic macrophages isolated from DSS-treated LRP5/6<sup>Flox</sup> and LRP5/6<sup>LysM</sup> mice (day 8). Data is representative of two experiments (n = 4-5 mice per experiment).
